# Supplementary material for: Hyperkalemia in Real-World Patients Under Continuous Medical Care in Japan
Source: PubMed Central journal article supplement — Kidney Int Rep. 2019 May 30;4(9):1248–60. doi: 10.1016/j.ekir.2019.05.018 (PMC6734103; doi:10.1016/j.ekir.2019.05.018), 2019-05-30
Supplement: mmc1.pdf [file mmc1.pdf]

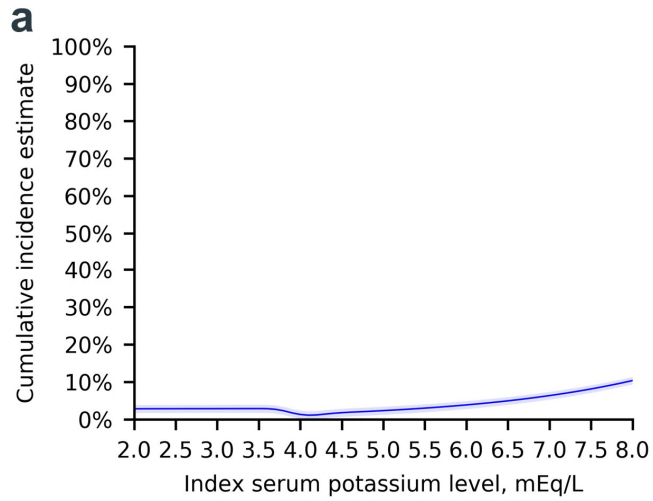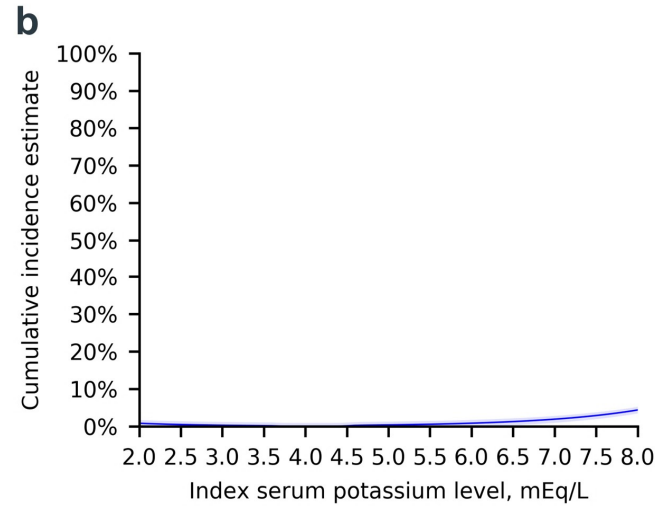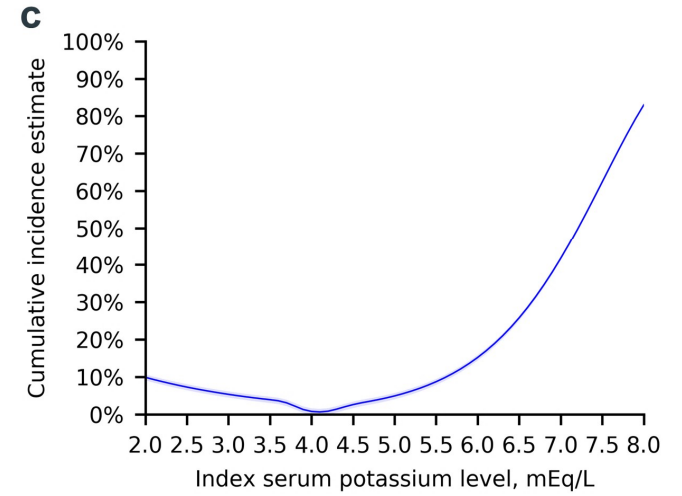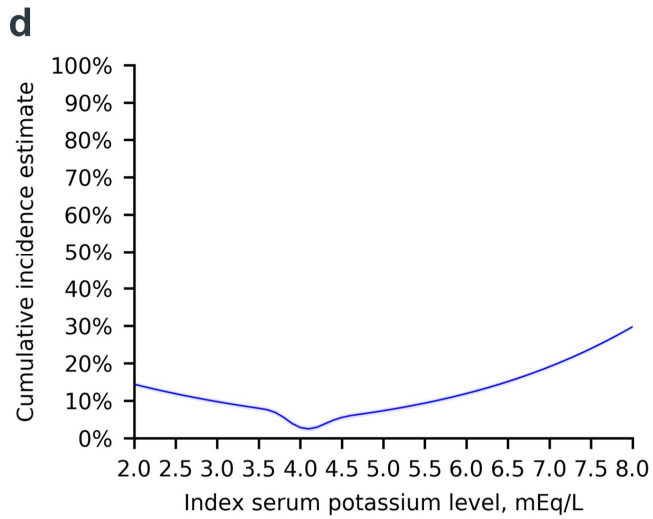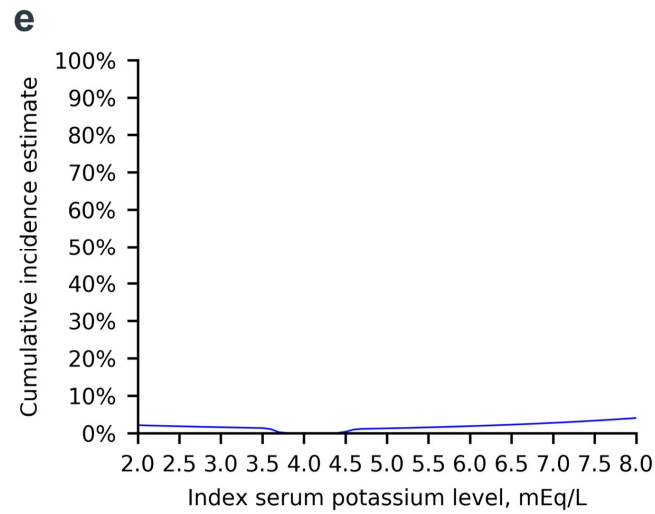

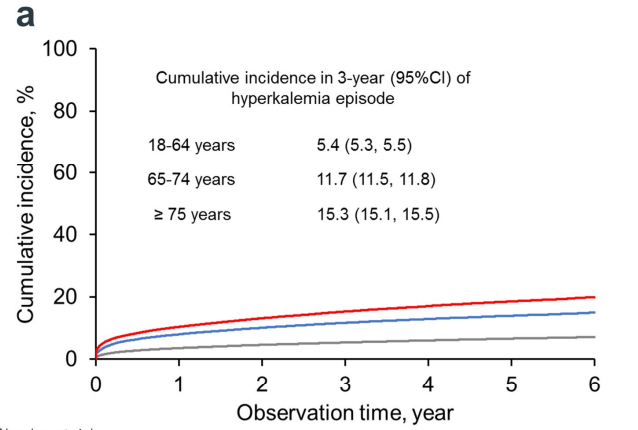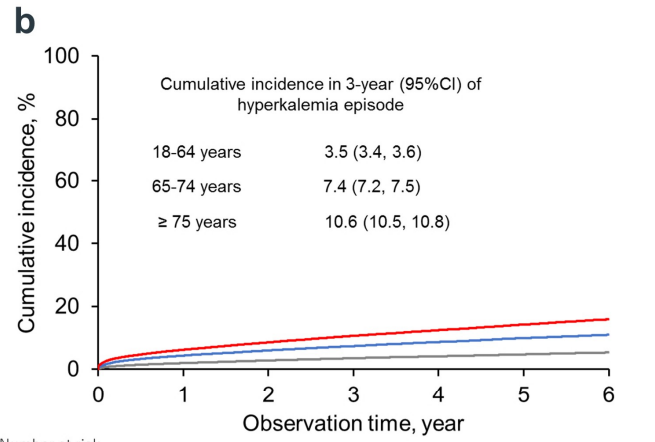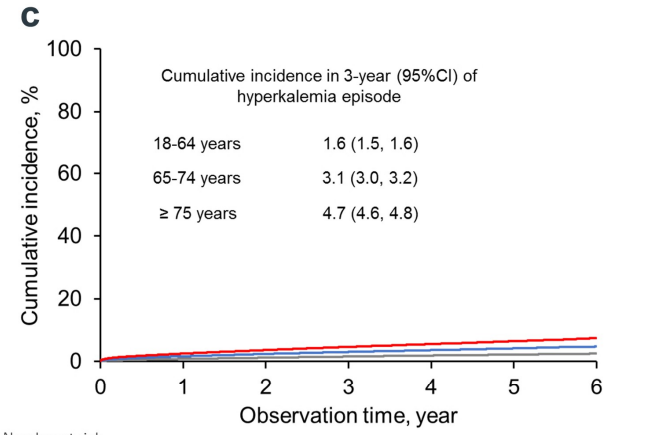

Number at risk

|       |         |         |         |         |        |        |        |
|-------|---------|---------|---------|---------|--------|--------|--------|
| 18-64 | 502,812 | 217,783 | 153,534 | 104,583 | 66,235 | 42,989 | 25,794 |
| 65-74 | 228,459 | 120,103 | 84,414  | 57,276  | 35,440 | 22,538 | 13,478 |
| ≥75   | 289,304 | 121,618 | 79,320  | 49,328  | 27,772 | 15,519 | 8,415  |

Number at risk

|       |         |         |         |         |        |        |        |
|-------|---------|---------|---------|---------|--------|--------|--------|
| 18-64 | 502,812 | 222,539 | 157,859 | 107,978 | 68,632 | 44,803 | 26,969 |
| 65-74 | 228,459 | 125,681 | 89,356  | 61,167  | 38,081 | 24,370 | 14,681 |
| ≥75   | 289,304 | 128,755 | 85,247  | 53,560  | 30,424 | 17,183 | 9,338  |

Number at risk

|       |         |         |         |         |        |        |        |
|-------|---------|---------|---------|---------|--------|--------|--------|
| 18-64 | 502,812 | 225,165 | 160,430 | 110,189 | 70,200 | 46,022 | 27,779 |
| 65-74 | 228,459 | 128,939 | 92,432  | 63,755  | 39,955 | 25,781 | 15,590 |
| ≥75   | 289,304 | 133,208 | 89,212  | 56,662  | 32,431 | 18,530 | 10,131 |

— 18-64 — 65-74 — ≥75

**Table S1. Definitions of high-risk subgroups**

| <b>Subgroup</b>        | <b>Definition</b>                                                                                                                                                                                                                                                                                                                                                                                                                                                                                                                                                                                                                                                                                                                                                                                                                                                                                                                                                |
|------------------------|------------------------------------------------------------------------------------------------------------------------------------------------------------------------------------------------------------------------------------------------------------------------------------------------------------------------------------------------------------------------------------------------------------------------------------------------------------------------------------------------------------------------------------------------------------------------------------------------------------------------------------------------------------------------------------------------------------------------------------------------------------------------------------------------------------------------------------------------------------------------------------------------------------------------------------------------------------------|
| Chronic kidney disease | Defined as either a diagnosis of chronic nephritic syndrome (ICD-10 code: N03), glomerular disease (N05-N08), chronic kidney disease/chronic renal failure (N18-N19), diabetic nephropathy (E102, E112, E122, E132, E142), or hypertension with renal failure (I120, I13), or the presence of an average eGFR of $<60 \text{ mL}\cdot\text{min}^{-1}\cdot 1.73 \text{ m}^{-2}$<br>CKD stage 1: $\text{eGFR} \geq 90 \text{ mL}\cdot\text{min}^{-1}\cdot 1.73 \text{ m}^{-2}$ , stage 2: $\text{eGFR} 60\text{-}89 \text{ mL}\cdot\text{min}^{-1}\cdot 1.73 \text{ m}^{-2}$ , stage 3a: $\text{eGFR} 45\text{-}59 \text{ mL}\cdot\text{min}^{-1}\cdot 1.73 \text{ m}^{-2}$ , stage 3b: $\text{eGFR} 30\text{-}44 \text{ mL}\cdot\text{min}^{-1}\cdot 1.73 \text{ m}^{-2}$ , stage 4: $\text{eGFR} 15\text{-}29 \text{ mL}\cdot\text{min}^{-1}\cdot 1.73 \text{ m}^{-2}$ , and stage 5: $\text{eGFR} < 15 \text{ mL}\cdot\text{min}^{-1}\cdot 1.73 \text{ m}^{-2}$ |
| Diabetes mellitus      | Defined as a diagnosis of DM (E10-E14)                                                                                                                                                                                                                                                                                                                                                                                                                                                                                                                                                                                                                                                                                                                                                                                                                                                                                                                           |
| Heart failure          | Defined as a diagnosis of heart failure (I50, I110)                                                                                                                                                                                                                                                                                                                                                                                                                                                                                                                                                                                                                                                                                                                                                                                                                                                                                                              |
| Hypertension           | Defined as a diagnosis of hypertension (I10-I15)                                                                                                                                                                                                                                                                                                                                                                                                                                                                                                                                                                                                                                                                                                                                                                                                                                                                                                                 |

ICD-10, International Classification of Diseases 10th revision; eGFR, estimated glomerular filtration rate; DM, diabetes mellitus

**Table S2. Definitions of clinical outcomes**

| <b>Outcome</b>                            | <b>Definition</b>                                                                                                                         |
|-------------------------------------------|-------------------------------------------------------------------------------------------------------------------------------------------|
| In-hospital death                         | Based on death information in the hospital discharge summary                                                                              |
| Cardiac events                            | Hospitalizations with ICD-10 codes of I21, I22, I23, I44, I45, I46, I47, I48, or I49                                                      |
| Hospitalization due to HF                 | ICD-10 code I50 or I110 as the main reason for hospitalization                                                                            |
| Introduction of renal replacement therapy | Presence of a national receipt code for dialysis or renal transplant                                                                      |
| CG-GI therapy                             | [Regular insulin or intermediate-acting insulin] and glucose injection prescribed on the same date, or prescriptions of calcium gluconate |
| Rehospitalization                         | Readmission within 30 days after discharge from previous hospitalization                                                                  |
| Recurrence of hyperkalemia episode        | An S-K level of $\geq 5.1$ mEq/L following a normal S-K level (3.6-5.0 mEq/L)                                                             |

ICD-10, International Classification of Diseases 10th revision; HF, heart failure; CG-GI, calcium gluconate and glucose-insulin; S-K, serum potassium

**Table S3. List of comorbidities**

| <b>Condition</b>                                              | <b>ICD-10 code</b>                                                                                                                                                                               |
|---------------------------------------------------------------|--------------------------------------------------------------------------------------------------------------------------------------------------------------------------------------------------|
| Myocardial infarction                                         | I21; I22; I23; I24                                                                                                                                                                               |
| Peripheral vascular disease                                   | I70; I71; I72; I73; I74; I77                                                                                                                                                                     |
| Cerebrovascular disease                                       | I60-I69; G45                                                                                                                                                                                     |
| Chronic pulmonary disease                                     | J40-J47; J60-J67; J684; J701; J703; J841; J920; J961; J982; J983                                                                                                                                 |
| Moderate to severe liver disease                              | B150; B160; B162; B190; K704; K72; K766; I85                                                                                                                                                     |
| Atrial fibrillation or atrial flutter                         | I48                                                                                                                                                                                              |
| Valvular heart disease                                        | I00-I02; I05-I09; I34; I35; I36; I37; Q20-Q25;                                                                                                                                                   |
| Alcoholism-related or other substance-abuse related disorders | T36-T65; F10-F19; G312; G612; G721; I426; K292; K860; K70; R780; T51; Z714;<br>Z721                                                                                                              |
| Acute kidney injury                                           | N17                                                                                                                                                                                              |
| Sepsis                                                        | A021, A207, A227, A241, A267, A282, A327, A394, A400-A403, A409-A415,<br>A418-A419, A427, A548, B007, B349, B377, D71, I301, I330, J020, J209, J950,<br>L029, L080, M8699, O080, O753, O85, O883 |
| Gastrointestinal bleeding                                     | K250, K252, K254, K256, K260, K262, K264, K266, K284, K290, K571, K573                                                                                                                           |
| Gastrointestinal perforation                                  | K251, K252, K255, K256, K261, K265, K266, K285, K570, K572                                                                                                                                       |
| Peripheral edema                                              | R600                                                                                                                                                                                             |

ICD-10, International Classification of Diseases 10th revision;

**Table S4. Comorbidities stratified by high-risk subgroups**

|                                                               | <b>Overall</b>  | <b>CKD</b>      | <b>DM</b>       | <b>HF</b>      | <b>HTN</b>      |
|---------------------------------------------------------------|-----------------|-----------------|-----------------|----------------|-----------------|
|                                                               | <b>n=25 395</b> | <b>n=14 322</b> | <b>n=12 101</b> | <b>n=8 570</b> | <b>n=16 463</b> |
| Comorbidity, n (%)                                            |                 |                 |                 |                |                 |
| Myocardial infarction                                         | 1 073 (4.2)     | 597 (4.2)       | 593 (4.9)       | 699 (8.2)      | 816 (5.0)       |
| Peripheral vascular disease                                   | 3 790 (14.9)    | 2 458 (17.2)    | 2 248 (18.6)    | 1 792 (20.9)   | 3 112 (18.9)    |
| Cerebrovascular disease                                       | 5 795 (22.8)    | 3 440 (24.0)    | 3 217 (26.6)    | 2 431 (28.4)   | 4 657 (28.3)    |
| Chronic pulmonary disease                                     | 4 196 (16.5)    | 2 336 (16.3)    | 2 025 (16.7)    | 1 924 (22.5)   | 3 059 (18.6)    |
| Moderate to severe liver disease                              | 491 (1.9)       | 211 (1.5)       | 222 (1.8)       | 112 (1.3)      | 283 (1.7)       |
| Atrial fibrillation or atrial flutter                         | 3 496 (13.8)    | 2 081 (14.5)    | 1 608 (13.3)    | 2 530 (29.5)   | 2 722 (16.5)    |
| Valvular heart disease                                        | 2 371 (9.3)     | 1 528 (10.7)    | 1 179 (9.7)     | 1 809 (21.1)   | 1 911 (11.6)    |
| Alcoholism-related or other substance-abuse related disorders | 641 (2.5)       | 296 (2.1)       | 303 (2.5)       | 159 (1.9)      | 376 (2.3)       |
| Acute kidney injury                                           | 1 145 (4.5)     | 598 (4.2)       | 431 (3.6)       | 521 (6.1)      | 592 (3.6)       |
| Sepsis                                                        | 2 796 (11.0)    | 1 429 (10.0)    | 1 371 (11.3)    | 1 196 (14.0)   | 1 825 (11.1)    |
| Gastrointestinal bleeding                                     | 915 (3.6)       | 469 (3.3)       | 407 (3.4)       | 321 (3.7)      | 611 (3.7)       |
| Gastrointestinal perforation                                  | 72 (0.3)        | 28 (0.2)        | 22 (0.2)        | 16 (0.2)       | 36 (0.2)        |
| Peripheral edema                                              | 575 (2.3)       | 398 (2.8)       | 303 (2.5)       | 284 (3.3)      | 484 (2.9)       |

CKD, chronic kidney disease; DM, diabetes mellitus; HF, heart failure; HTN, hypertension

**Table S5. Prescription coverage of potassium binder prescribed on index date**

|                | <b>Overall</b> | <b>CKD</b>     | <b>DM</b>    | <b>HF</b>    | <b>HTN</b>     |
|----------------|----------------|----------------|--------------|--------------|----------------|
|                | <b>n=1 468</b> | <b>n=1 308</b> | <b>n=825</b> | <b>n=543</b> | <b>n=1 171</b> |
| <b>MPR (%)</b> |                |                |              |              |                |
| Mean±SD        | 77.2±29.0      | 78.1±28.6      | 78.5±27.7    | 77.2±29.9    | 78.4±28.7      |
| Median         | 91.6           | 92.6           | 92.2         | 92.1         | 93.3           |
| <b>PDC (%)</b> |                |                |              |              |                |
| Mean±SD        | 54.8±41.0      | 58.8±39.9      | 58.0±39.8    | 53.0±40.7    | 58.6±40.3      |
| Median         | 61.7           | 71.4           | 69.6         | 52.5         | 71.9           |

CKD, chronic kidney disease; DM, diabetes mellitus; HF, heart failure; HTN, hypertension; MPR, medication possession ratio; PDC, proportion of days covered; SD, standard deviation

PDC was the proportion of days covered with potassium binder treatment supplied during a 1-year fixed follow-up period.

MPR was the number of days with potassium binder treatment supplied within the refill interval.

STROBE Statement—checklist of items that should be included in reports of observational studies

|                           | Item No. | Recommendation                                                                                                                                                                                                                                                                                                                                                                                                                                                         | Page No. | Relevant part from manuscript                                                                                                                           |
|---------------------------|----------|------------------------------------------------------------------------------------------------------------------------------------------------------------------------------------------------------------------------------------------------------------------------------------------------------------------------------------------------------------------------------------------------------------------------------------------------------------------------|----------|---------------------------------------------------------------------------------------------------------------------------------------------------------|
| <b>Title and abstract</b> | 1        | (a) Indicate the study’s design with a commonly used term in the title or the abstract                                                                                                                                                                                                                                                                                                                                                                                 | 1-2      | Title and abstract                                                                                                                                      |
|                           |          | (b) Provide in the abstract an informative and balanced summary of what was done and what was found                                                                                                                                                                                                                                                                                                                                                                    | 2        | Abstract section                                                                                                                                        |
| <b>Introduction</b>       |          |                                                                                                                                                                                                                                                                                                                                                                                                                                                                        |          |                                                                                                                                                         |
| Background/rationale      | 2        | Explain the scientific background and rationale for the investigation being reported                                                                                                                                                                                                                                                                                                                                                                                   | 3        | Introduction                                                                                                                                            |
| Objectives                | 3        | State specific objectives, including any prespecified hypotheses                                                                                                                                                                                                                                                                                                                                                                                                       | 3        | Line 64 “Herein, ...”                                                                                                                                   |
| <b>Methods</b>            |          |                                                                                                                                                                                                                                                                                                                                                                                                                                                                        |          |                                                                                                                                                         |
| Study design              | 4        | Present key elements of study design early in the paper                                                                                                                                                                                                                                                                                                                                                                                                                | 4        | Study design and patient selection                                                                                                                      |
| Setting                   | 5        | Describe the setting, locations, and relevant dates, including periods of recruitment, exposure, follow-up, and data collection                                                                                                                                                                                                                                                                                                                                        | 4        | Study design and patient selection                                                                                                                      |
| Participants              | 6        | (a) <i>Cohort study</i> —Give the eligibility criteria, and the sources and methods of selection of participants. Describe methods of follow-up<br><i>Case-control study</i> —Give the eligibility criteria, and the sources and methods of case ascertainment and control selection. Give the rationale for the choice of cases and controls<br><i>Cross-sectional study</i> —Give the eligibility criteria, and the sources and methods of selection of participants | 4        | Study design and patient selection<br>Line 82 “Hyperkalemia was defined...”                                                                             |
|                           |          | (b) <i>Cohort study</i> —For matched studies, give matching criteria and number of exposed and unexposed<br><i>Case-control study</i> —For matched studies, give matching criteria and the number of controls per case                                                                                                                                                                                                                                                 | N.A.     | N.A.                                                                                                                                                    |
| Variables                 | 7        | Clearly define all outcomes, exposures, predictors, potential confounders, and effect modifiers. Give diagnostic criteria, if applicable                                                                                                                                                                                                                                                                                                                               | 4-6      | Study design and patient selection and statistical analysis<br>We used the ICD-10 codes for disease diagnoses and the relevant codes used in this study |



|                              |    |                                                                                                                                                                                      |   |                                               |
|------------------------------|----|--------------------------------------------------------------------------------------------------------------------------------------------------------------------------------------|---|-----------------------------------------------|
|                              |    |                                                                                                                                                                                      |   | is summarized in the supplementary materials. |
| Data sources/<br>measurement | 8* | For each variable of interest, give sources of data and details of methods of assessment (measurement). Describe comparability of assessment methods if there is more than one group | 4 | Data source                                   |
| Bias                         | 9  | Describe any efforts to address potential sources of bias                                                                                                                            | 6 | Statistical analysis                          |
| Study size                   | 10 | Explain how the study size was arrived at                                                                                                                                            | 4 | Study design and patient selection            |

Continued on next page

|                        |     |                                                                                                                                                                                                                                                                                                           |      |                                                                                                                                                                                                        |
|------------------------|-----|-----------------------------------------------------------------------------------------------------------------------------------------------------------------------------------------------------------------------------------------------------------------------------------------------------------|------|--------------------------------------------------------------------------------------------------------------------------------------------------------------------------------------------------------|
| Quantitative variables | 11  | Explain how quantitative variables were handled in the analyses. If applicable, describe which groupings were chosen and why                                                                                                                                                                              | 4-5  | Covariates and statistical analysis<br>We set high-risk subgroups to study the patient at risk of developing hyperkalemia. Rationale of choosing the criteria is summarized in the covariates section. |
| Statistical methods    | 12  | (a) Describe all statistical methods, including those used to control for confounding                                                                                                                                                                                                                     | 6    | Statistical analysis<br>Line 115 “The associations between...”                                                                                                                                         |
|                        |     | (b) Describe any methods used to examine subgroups and interactions                                                                                                                                                                                                                                       | 6    | Statistical analysis<br>Line 124 “Subgroup analyses of prevalence...”                                                                                                                                  |
|                        |     | (c) Explain how missing data were addressed                                                                                                                                                                                                                                                               | N.A. | N.A.                                                                                                                                                                                                   |
|                        |     | (d) <i>Cohort study</i> —If applicable, explain how loss to follow-up was addressed<br><i>Case-control study</i> —If applicable, explain how matching of cases and controls was addressed<br><i>Cross-sectional study</i> —If applicable, describe analytical methods taking account of sampling strategy | N.A. | N.A.                                                                                                                                                                                                   |
|                        |     | (e) Describe any sensitivity analyses                                                                                                                                                                                                                                                                     | 6    | Statistical analysis<br>Line 122 “Although an S-K reading...”                                                                                                                                          |
| <b>Results</b>         |     |                                                                                                                                                                                                                                                                                                           |      |                                                                                                                                                                                                        |
| Participants           | 13* | (a) Report numbers of individuals at each stage of study—eg numbers potentially eligible, examined for eligibility, confirmed eligible, included in the study, completing follow-up, and analysed                                                                                                         | 7    | Results<br>Line 134 “We extracted 1 022 087 patients...”                                                                                                                                               |
|                        |     | (b) Give reasons for non-participation at each stage                                                                                                                                                                                                                                                      | 7    | Results<br>Line 136 “After excluding 16 033 patients...”                                                                                                                                               |
|                        |     | (c) Consider use of a flow diagram                                                                                                                                                                                                                                                                        | 7    | Results<br>Summarized in the figure 1                                                                                                                                                                  |
| Descriptive data       | 14* | (a) Give characteristics of study participants (eg demographic, clinical, social) and information on exposures and potential confounders                                                                                                                                                                  | 24   | Results<br>Table 2. Patient characteristics                                                                                                                                                            |

|              |     |                                                                                                                                                                                                              |      |                                                                                                                                                                                       |
|--------------|-----|--------------------------------------------------------------------------------------------------------------------------------------------------------------------------------------------------------------|------|---------------------------------------------------------------------------------------------------------------------------------------------------------------------------------------|
|              |     | (b) Indicate number of participants with missing data for each variable of interest                                                                                                                          | N.A. | N.A.                                                                                                                                                                                  |
|              |     | (c) <i>Cohort study</i> —Summarise follow-up time (eg, average and total amount)                                                                                                                             | 21   | Results<br>Table 3. Patient characteristics                                                                                                                                           |
| Outcome data | 15* | <i>Cohort study</i> —Report numbers of outcome events or summary measures over time                                                                                                                          | 7-8  | Results<br>We summarized measures of the prevalence, incidence, treatment patterns, potassium control status, and results of cubic spline analyses in the results.                    |
|              |     | <i>Case-control study</i> —Report numbers in each exposure category, or summary measures of exposure                                                                                                         | N.A. | N.A.                                                                                                                                                                                  |
|              |     | <i>Cross-sectional study</i> —Report numbers of outcome events or summary measures                                                                                                                           | N.A. | N.A.                                                                                                                                                                                  |
| Main results | 16  | (a) Give unadjusted estimates and, if applicable, confounder-adjusted estimates and their precision (eg, 95% confidence interval). Make clear which confounders were adjusted for and why they were included | 7-8  | Results<br>We presented the estimated precision range (95% confidence interval) of the outcomes of interest. The confounder adjusted in the study is explained in the method section. |
|              |     | (b) Report category boundaries when continuous variables were categorized                                                                                                                                    | 7-8  | Results<br>We applied a category boundary when we studied the cumulative incidence of hyperkalemia by age groups. The results are summarized in the main text as well as Figure S2.   |
|              |     | (c) If relevant, consider translating estimates of relative risk into absolute risk for a meaningful time period                                                                                             | N.A. | N.A.                                                                                                                                                                                  |

Continued on next page

|                          |    |                                                                                                                                                                            |    |                                                                                                                                                                   |
|--------------------------|----|----------------------------------------------------------------------------------------------------------------------------------------------------------------------------|----|-------------------------------------------------------------------------------------------------------------------------------------------------------------------|
| Other analyses           | 17 | Report other analyses done—eg analyses of subgroups and interactions, and sensitivity analyses                                                                             | 9  | Results<br>We applied different cut-off value of S-K for the analysis of recurrent hyperlalemia. The results are summarized in the main text as well as Figure 9. |
| <b>Discussion</b>        |    |                                                                                                                                                                            |    |                                                                                                                                                                   |
| Key results              | 18 | Summarise key results with reference to study objectives                                                                                                                   | 9  | Discussion<br>Line 197 “To our knowledge...”                                                                                                                      |
| Limitations              | 19 | Discuss limitations of the study, taking into account sources of potential bias or imprecision. Discuss both direction and magnitude of any potential bias                 | 12 | Discussion<br>Line 269 “This study has several limitations...”                                                                                                    |
| Interpretation           | 20 | Give a cautious overall interpretation of results considering objectives, limitations, multiplicity of analyses, results from similar studies, and other relevant evidence | 12 | Discussion<br>Line 243 “This study has several limitations...”                                                                                                    |
| Generalisability         | 21 | Discuss the generalisability (external validity) of the study results                                                                                                      | 12 | Discussion<br>Line 280 “Second, the data were mostly...”                                                                                                          |
| <b>Other information</b> |    |                                                                                                                                                                            |    |                                                                                                                                                                   |
| Funding                  | 22 | Give the source of funding and the role of the funders for the present study and, if applicable, for the original study on which the present article is based              | 13 | Acknowledgements                                                                                                                                                  |

\*Give information separately for cases and controls in case-control studies and, if applicable, for exposed and unexposed groups in cohort and cross-sectional studies.

**Note:** An Explanation and Elaboration article discusses each checklist item and gives methodological background and published examples of transparent reporting. The STROBE checklist is best used in conjunction with this article (freely available on the Web sites of PLoS Medicine at <http://www.plosmedicine.org/>, Annals of Internal Medicine at <http://www.annals.org/>, and Epidemiology at <http://www.epidem.com/>). Information on the STROBE Initiative is available at [www.strobe-statement.org](http://www.strobe-statement.org).
